# Supplementary material for: Chemotherapy-Free Survival of CDK4/6 Inhibitor Combination Therapy or Endocrine Monotherapy as First-Line Treatment for HR+/HER2–Advanced Breast Cancer
Source: Research Square preprint supplement (doi:10.21203/rs.3.rs-7266744/v1), 2025-09-01

**Supplemental files**

**Chemotherapy-free Survival in HR-positive HER2-negative Breast Cancer: CDK4/6 Inhibitor Combination Therapy vs. Endocrine Monotherapy**

**Supplemental Table 1:** Status of First-Line Treatment and Reasons for Discontinuation

**Supplemental Figure 1**: Kaplan–Meier curves of chemotherapy-free survival 2 after the inverse probability of treatment weighting, Unadjusted analysis (a); after inverse probability of treatment weighting (b)

**Supplemental Figure 2**: Kaplan–Meier curves of time to treatment failure 1 after the inverse probability of treatment weighting, Unadjusted analysis (a); after inverse probability of treatment weighting (b)

**Supplemental Figure 3**: Kaplan–Meier curves of time to treatment failure 2 after the inverse probability of treatment weighting, Unadjusted analysis (a); after inverse probability of treatment weighting (b)

**Supplemental Table 1:** Reasons for Discontinuation of First-Line Treatment

|  | Monotherapy  N = 318 | CDK4/6i  N = 125 |
| --- | --- | --- |
| Ongoing first-line treatment, n (%) | 18 (5.7) | 20 (16.0) |
| Reasons for Discontinuation, n (%) | 300 (94.3) | 105 (84.0) |
| Progressive disease | 244 (81.3) | 82 (78.1) |
| Adverse events | 14 (4.7) | 10 (9.5) |
| Patient’s wish | 9 (3.0) | 7 (6.6) |
| Physician’s decision (other reasons) | 29 (9.7) | 3 (2.9) |
| Unknown | 4 (1.3) | 3 (2.9) |

CDK4/6i, cyclin-dependent kinase 4/6 inhibitor

**Supplemental Figure 1**: Kaplan–Meier curves of chemotherapy-free survival 2 after inverse probability of treatment weighting, Unadjusted analysis (a); after inverse probability of treatment weighting (b)

CFS, chemotherapy-free survival; CDK4/6i, cyclin-dependent kinase 4/6 inhibitor; HR, hazard ratio


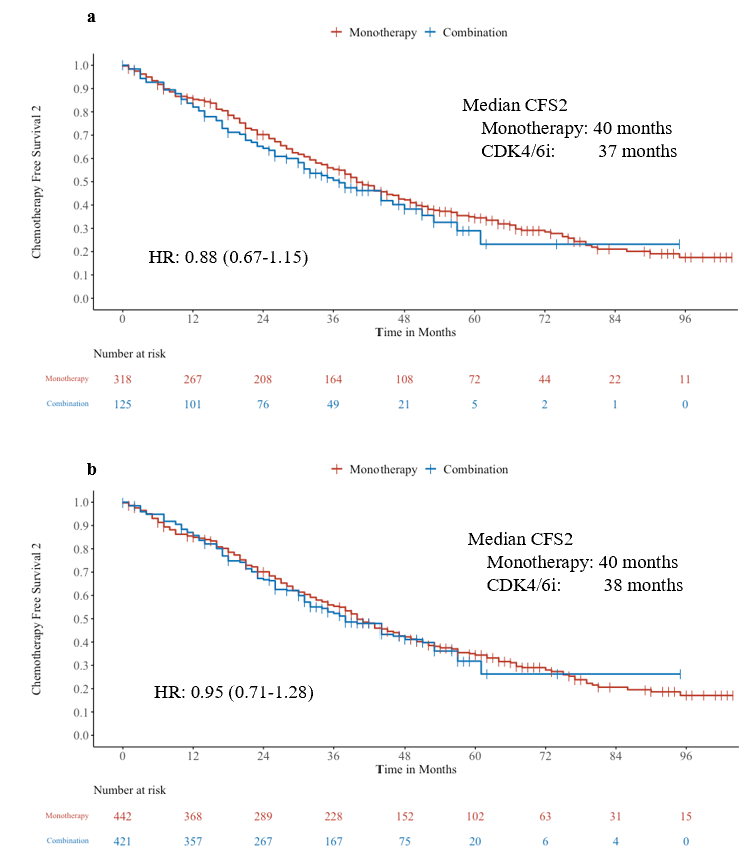


**Supplemental Figure 2**: Kaplan–Meier curves of time to treatment failure 1 after the inverse probability of treatment weighting, Unadjusted analysis (a); after inverse probability of treatment weighting (b)

TTF, time to treatment failure; CDK4/6i, cyclin-dependent kinase 4/6 inhibitor; HR, hazard ratio


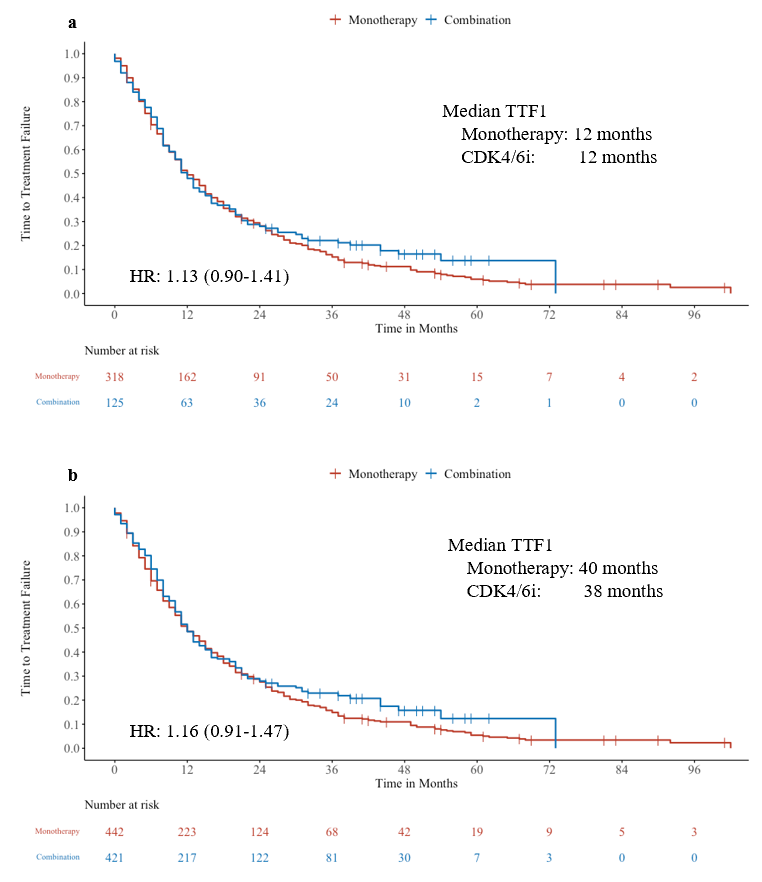


**Supplemental Figure 3**: Kaplan–Meier curves of time to treatment failure 2 after the inverse probability of treatment weighting, Unadjusted analysis (a); after inverse probability of treatment weighting (b)

TTF, time to treatment failure; CDK4/6i, cyclin-dependent kinase 4/6 inhibitor; HR, hazard ratio


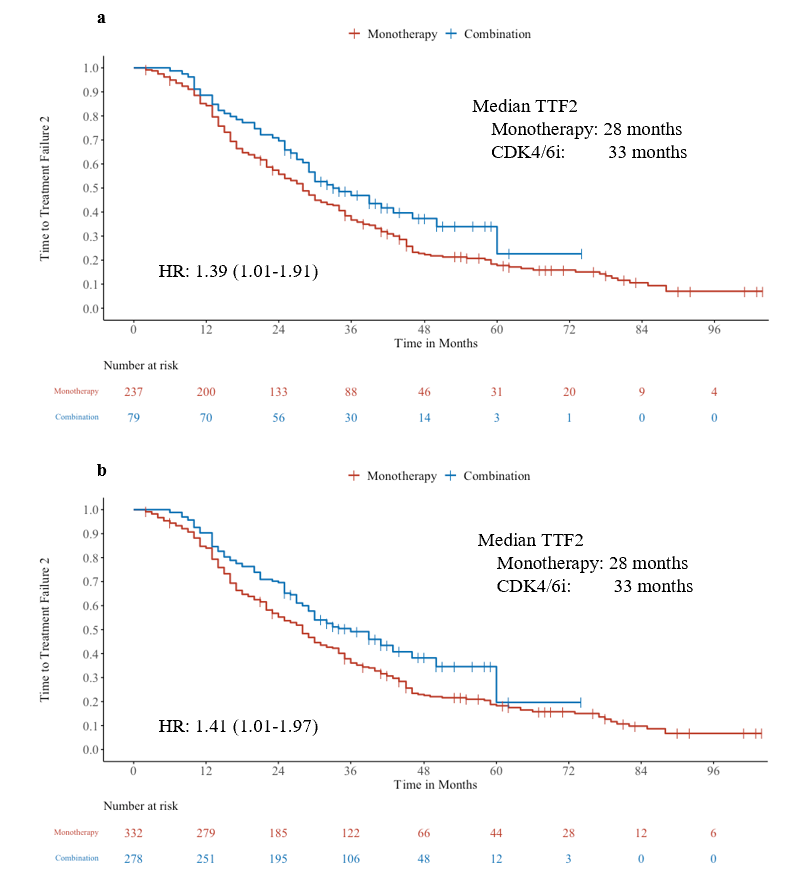

Supplement: Supplementary file 1 [file d235113db45057c758dd7cb5.docx]
